# Supplementary material
Source: PubMed Central journal article supplement (PMC4889344)
Supplement: pnas.1514034112.sd01.pdf [file pnas.1514034112.sd01.pdf]

## Dataset S1

1. Note that scaling of INP for total particle number (e.g., Fig. 1a) is not applied to laboratory data in this table.
2. Surface areas in CFDC measurements account for the use of a 2.4 micron pre-impactor. IS filters were considered to have captured all particle size in the ambient atmosphere, and all particles up to 2.5 microns in CAICE lab studies on the basis of similar sample line sizes and lengths as used for aerosol size distribution measurements.
3. NA: not available or not applicable
4. January 2013 data is for extremely high fluorescence conditions.
5. INP- and INP+ are values to be subtracted or added to give 95% confidence limit error bars.

| Sample type | date                        | location        | avg-lat | avg-lon | alt | Wind speed (ship) | Project | Volume | Temp  | INP             | INP-            | INP+            | CPC >10nm        | sfc area                         | n <sub>s</sub>   |
|-------------|-----------------------------|-----------------|---------|---------|-----|-------------------|---------|--------|-------|-----------------|-----------------|-----------------|------------------|----------------------------------|------------------|
|             |                             |                 | deg     | deg     | m   | m s <sup>-1</sup> |         | L      | °C    | L <sup>-1</sup> | L <sup>-1</sup> | L <sup>-1</sup> | cm <sup>-3</sup> | μm <sup>2</sup> cm <sup>-3</sup> | cm <sup>-2</sup> |
| IS-filter   | Jul-20-2013 to July 21-2013 | Eastern Pacific | 31.3    | -125.6  | 20  | 11.3              | MAGIC   | 7595   | -13.2 | 0.0006          | 0.00048         | 0.0026          | 245              | 12                               | 4.96             |
| IS-filter   | Jul-20-2013 to July 21-2013 | Eastern Pacific | 31.3    | -125.6  | 20  | 11.3              | MAGIC   | 7595   | -15.0 | 0.0006          | 0.00048         | 0.0026          | 245              | 12                               | 4.96             |
| IS-filter   | Jul-20-2013 to July 21-2013 | Eastern Pacific | 31.3    | -125.6  | 20  | 11.3              | MAGIC   | 7595   | -17.0 | 0.0025          | 0.0015          | 0.0037          | 245              | 12                               | 20.88            |
| IS-filter   | Jul-20-2013 to July 21-2013 | Eastern Pacific | 31.3    | -125.6  | 20  | 11.3              | MAGIC   | 7595   | -18.5 | 0.007           | 0.0033          | 0.0054          | 245              | 12                               | 58.58            |
| IS-filter   | Jul-20-2013 to July 21-2013 | Eastern Pacific | 31.3    | -125.6  | 20  | 11.3              | MAGIC   | 7595   | -20.0 | 0.012           | 0.0051          | 0.0072          | 245              | 12                               | 102.62           |
| IS-filter   | Jul-20-2013 to July 21-2013 | Eastern Pacific | 31.3    | -125.6  | 20  | 11.3              | MAGIC   | 7595   | -22.2 | 0.04            | 0.016           | 0.017           | 245              | 12                               | 333.14           |
| IS-filter   | Jul-22-2013 to July 23-2013 | Eastern Pacific | 23.1    | -151.7  | 20  | 6.9               | MAGIC   | 8170   | -17.0 | 0.00058         | 0.00047         | 0.0025          | 250              | 6                                | 9.72             |
| IS-filter   | Jul-22-2013 to July 23-2013 | Eastern Pacific | 23.1    | -151.7  | 20  | 6.9               | MAGIC   | 8170   | -18.5 | 0.0031          | 0.0018          | 0.0039          | 250              | 6                                | 51.99            |
| IS-filter   | Jul-22-2013 to July 23-2013 | Eastern Pacific | 23.1    | -151.7  | 20  | 6.9               | MAGIC   | 8170   | -20.0 | 0.0064          | 0.0031          | 0.0051          | 250              | 6                                | 106.42           |
| IS-filter   | Jul-22-2013 to July 23-2013 | Eastern Pacific | 23.1    | -151.7  | 20  | 6.9               | MAGIC   | 8170   | -20.0 | 0.0027          | 0.0017          | 0.0038          | 250              | 6                                | 45.26            |

|           |                             |                 |       |        |      |     |       |        |       |          |          |          |     |    |        |
|-----------|-----------------------------|-----------------|-------|--------|------|-----|-------|--------|-------|----------|----------|----------|-----|----|--------|
| IS-filter | Jul-22-2013 to July 23-2013 | Eastern Pacific | 23.1  | -151.7 | 20   | 6.9 | MAGIC | 8170   | -22.2 | 0.0150   | 0.0060   | 0.0081   | 250 | 6  | 252.96 |
| IS-filter | Jul-22-2013 to July 23-2013 | Eastern Pacific | 23.1  | -151.7 | 20   | 6.9 | MAGIC | 8170   | -22.2 | 0.0082   | 0.0037   | 0.0057   | 250 | 6  | 136.26 |
| IS-filter | Jul-15-2011                 | Puerto Rico     | 18.27 | -65.75 | 1060 | NA  | ICE-T | 2610   | -12.6 | 0.0010   | 0.0008   | 0.0045   | 300 | 80 | 1.22   |
| IS-filter | Jul-15-2011                 | Puerto Rico     | 18.27 | -65.75 | 1060 | NA  | ICE-T | 2610   | -16.1 | 0.0030   | 0.0021   | 0.0058   | 300 | 80 | 3.73   |
| IS-filter | Jul-15-2011                 | Puerto Rico     | 18.27 | -65.75 | 1060 | NA  | ICE-T | 2610   | -18.6 | 0.0096   | 0.0048   | 0.0084   | 300 | 80 | 12.02  |
| IS-filter | Jul-15-2011                 | Puerto Rico     | 18.38 | -65.62 | 60   | NA  | ICE-T | 3480   | -13.9 | 0.0015   | 0.0011   | 0.0039   | 300 | 80 | 1.85   |
| IS-filter | Jul-15-2011                 | Puerto Rico     | 18.38 | -65.62 | 60   | NA  | ICE-T | 3480   | -15.9 | 0.0063   | 0.0027   | 0.0072   | 300 | 80 | 7.91   |
| IS-filter | Jul-15-2011                 | Puerto Rico     | 18.38 | -65.62 | 60   | NA  | ICE-T | 3480   | -18.3 | 0.0271   | 0.0095   | 0.0123   | 300 | 80 | 33.86  |
| IS-filter | Jul-17-2011                 | Puerto Rico     | 18.38 | -65.62 | 60   | NA  | ICE-T | 3480   | -12.6 | 0.0007   | 0.0006   | 0.0034   | 450 | 80 | 0.91   |
| IS-filter | Jul-17-2011                 | Puerto Rico     | 18.38 | -65.62 | 60   | NA  | ICE-T | 3480   | -14.4 | 0.0015   | 0.0011   | 0.0039   | 450 | 80 | 1.85   |
| IS-filter | Jul-17-2011                 | Puerto Rico     | 18.38 | -65.62 | 60   | NA  | ICE-T | 3480   | -16.7 | 0.0015   | 0.0011   | 0.0039   | 450 | 80 | 1.85   |
| IS-filter | Jul-17-2011                 | Puerto Rico     | 18.38 | -65.62 | 60   | NA  | ICE-T | 3480   | -18.3 | 0.0063   | 0.0033   | 0.0060   | 450 | 80 | 7.91   |
| IS-filter | Jul-23-2011                 | C-130 aircraft  | 17.5  | -64.5  | 400  | NA  | ICE-T | 460    | -14.0 | 0.015    | 0.0092   | 0.0228   | 300 | 70 | 21.62  |
| IS-filter | Jul-23-2011                 | C-130 aircraft  | 17.5  | -64.5  | 400  | NA  | ICE-T | 460    | -16.0 | 0.015    | 0.0092   | 0.0228   | 300 | 70 | 21.62  |
| IS-filter | Jul-23-2011                 | C-130 aircraft  | 17.5  | -64.5  | 400  | NA  | ICE-T | 460    | -18.0 | 0.055    | 0.0232   | 0.0370   | 300 | 70 | 78.47  |
| IS-filter | Jul-23-2011                 | C-130 aircraft  | 17.5  | -64.5  | 400  | NA  | ICE-T | 460    | -20.0 | 0.065    | 0.0264   | 0.0401   | 300 | 70 | 93.09  |
| IS-filter | Jul-23-2011                 | C-130 aircraft  | 17.5  | -64.5  | 400  | NA  | ICE-T | 460    | -21.0 | 0.100    | 0.0365   | 0.0496   | 300 | 70 | 142.95 |
| IS-filter | Jul-23-2011                 | C-130 aircraft  | 17.5  | -64.5  | 400  | NA  | ICE-T | 460    | -22.0 | 0.121    | 0.0417   | 0.0549   | 300 | 70 | 172.21 |
| IS-filter | Jul-23-2011                 | C-130 aircraft  | 17.5  | -64.5  | 400  | NA  | ICE-T | 460    | -23.0 | 0.241    | 0.0762   | 0.0888   | 300 | 70 | 344.42 |
| IS-filter | Jul-23-2011                 | C-130 aircraft  | 17.5  | -64.5  | 400  | NA  | ICE-T | 460    | -24.0 | 0.335    | 0.1077   | 0.1205   | 300 | 70 | 478.33 |
| IS-filter | Jul-22-2011 to Jul-24-2011  | Puerto Rico     | 18.38 | -65.62 | 60   | NA  | ICE-T | 220000 | -6.0  | 0.000018 | 0.000014 | 0.000077 | 300 | 60 | 0.03   |
| IS-filter | Jul-22-2011 to Jul-24-2011  | Puerto Rico     | 18.38 | -65.62 | 60   | NA  | ICE-T | 220000 | -7.0  | 0.000036 | 0.000025 | 0.000088 | 300 | 60 | 0.06   |

|           |                            |             |       |        |    |    |       |        |       |          |          |          |     |     |          |
|-----------|----------------------------|-------------|-------|--------|----|----|-------|--------|-------|----------|----------|----------|-----|-----|----------|
| IS-filter | Jul-22-2011 to Jul-24-2011 | Puerto Rico | 18.38 | -65.62 | 60 | NA | ICE-T | 220000 | -8.0  | 0.000095 | 0.000055 | 0.000119 | 300 | 60  | 0.16     |
| IS-filter | Jul-22-2011 to Jul-24-2011 | Puerto Rico | 18.38 | -65.62 | 60 | NA | ICE-T | 220000 | -8.7  | 0.00018  | 0.00009  | 0.000152 | 300 | 60  | 0.31     |
| IS-filter | Jul-22-2011 to Jul-24-2011 | Puerto Rico | 18.38 | -65.62 | 60 | NA | ICE-T | 220000 | -12.9 | 0.00032  | 0.00014  | 0.000199 | 300 | 60  | 0.53     |
| IS-filter | Jul-22-2011 to Jul-24-2011 | Puerto Rico | 18.38 | -65.62 | 60 | NA | ICE-T | 220000 | -13.7 | 0.00040  | 0.00016  | 0.000228 | 300 | 60  | 0.67     |
| CFDC      | Nov-1-2011                 | CAICE       | NA    | NA     | NA | NA | Wave  | 7.5    | -25.2 | 0.62     | 0.57     | 0.57     | 30  | 30  | 2063.22  |
| CFDC      | Nov-1-2011                 | CAICE       | NA    | NA     | NA | NA | Wave  | 7.5    | -25.2 | 0.39     | 0.46     | 0.46     | 30  | 30  | 1312.01  |
| CFDC      | Nov-1-2011                 | CAICE       | NA    | NA     | NA | NA | Wave  | 7.5    | -30.4 | 1.99     | 1.03     | 1.03     | 30  | 30  | 6625.90  |
| CFDC      | Nov-1-2011                 | CAICE       | NA    | NA     | NA | NA | Wave  | 7.5    | -30.2 | 3.83     | 1.43     | 1.43     | 30  | 30  | 12759.90 |
| CFDC      | Nov-1-2011                 | CAICE       | NA    | NA     | NA | NA | Wave  | 7.5    | -30.1 | 5.14     | 1.66     | 1.66     | 30  | 30  | 17120.00 |
| CFDC      | Nov-1-2011                 | CAICE       | NA    | NA     | NA | NA | Wave  | 7.5    | -29.9 | 4.60     | 1.57     | 1.57     | 30  | 30  | 15340.63 |
| CFDC      | Nov-1-2011                 | CAICE       | NA    | NA     | NA | NA | Wave  | 7.5    | -29.9 | 2.23     | 1.09     | 1.09     | 30  | 30  | 7417.32  |
| CFDC      | Nov-1-2011                 | CAICE       | NA    | NA     | NA | NA | Wave  | 7.5    | -32.1 | 7.50     | 2.00     | 2.00     | 30  | 30  | 25001.68 |
| CFDC      | Nov-1-2011                 | CAICE       | NA    | NA     | NA | NA | Wave  | 7.5    | -32.6 | 12.94    | 2.63     | 2.63     | 30  | 30  | 43129.18 |
| CFDC      | Nov-1-2011                 | CAICE       | NA    | NA     | NA | NA | Wave  | 7.5    | -32.3 | 5.99     | 1.79     | 1.79     | 30  | 30  | 19981.36 |
| CFDC      | Nov-1-2011                 | CAICE       | NA    | NA     | NA | NA | Wave  | 7.5    | -32.3 | 7.17     | 1.96     | 1.96     | 30  | 30  | 23905.30 |
| CFDC      | Nov-1-2011                 | CAICE       | NA    | NA     | NA | NA | Wave  | 7.5    | -31.8 | 5.99     | 1.79     | 1.79     | 30  | 30  | 19972.75 |
| CFDC      | Nov-1-2011                 | CAICE       | NA    | NA     | NA | NA | Wave  | 7.5    | -32.0 | 5.38     | 1.69     | 1.69     | 30  | 30  | 17937.68 |
| MOUDI-DFT | Nov-7-2011 to Nov-8-2011   | CAICE       | NA    | NA     | NA | NA | Wave  | 28546  | -25.0 | 0.26     | 0.18     | 0.18     | 175 | 275 | 96.16    |
| MOUDI-DFT | Nov-7-2011 to Nov-8-2011   | CAICE       | NA    | NA     | NA | NA | Wave  | 28546  | -28.0 | 0.31     | 0.18     | 0.18     | 175 | 275 | 111.51   |
| MOUDI-DFT | Nov-7-2011 to Nov-8-2011   | CAICE       | NA    | NA     | NA | NA | Wave  | 28546  | -30.0 | 2.46     | 1.30     | 1.30     | 175 | 275 | 895.50   |
| MOUDI-DFT | Nov-7-2011 to Nov-8-2011   | CAICE       | NA    | NA     | NA | NA | Wave  | 28546  | -33.0 | 6.60     | 3.37     | 3.37     | 175 | 275 | 2400.01  |
| IS-filter | Nov-8-2011                 | CAICE       | NA    | NA     | NA | NA | Wave  | 10500  | -14.6 | 0.0003   | 0.0003   | 0.0014   | 150 | 152 | 0.18     |

|           |                            |       |    |    |    |    |      |       |       |        |        |        |     |     |         |
|-----------|----------------------------|-------|----|----|----|----|------|-------|-------|--------|--------|--------|-----|-----|---------|
| IS-filter | Nov-8-2011                 | CAICE | NA | NA | NA | NA | Wave | 10500 | -18.5 | 0.0022 | 0.0021 | 0.0056 | 150 | 152 | 1.45    |
| CFDC      | Nov-8-2011                 | CAICE | NA | NA | NA | NA | Wave | 7.5   | -30.0 | 2.44   | 1.14   | 1.14   | 150 | 152 | 1607.93 |
| CFDC      | Nov-8-2011                 | CAICE | NA | NA | NA | NA | Wave | 7.5   | -29.9 | 2.70   | 1.20   | 1.20   | 150 | 152 | 1773.77 |
| CFDC      | Nov-8-2011                 | CAICE | NA | NA | NA | NA | Wave | 7.5   | -32.8 | 8.05   | 2.07   | 2.07   | 150 | 152 | 5298.37 |
| CFDC      | Nov-8-2011                 | CAICE | NA | NA | NA | NA | Wave | 7.5   | -32.8 | 6.15   | 1.81   | 1.81   | 150 | 152 | 4049.11 |
| CFDC      | Nov-8-2011                 | CAICE | NA | NA | NA | NA | Wave | 7.5   | -32.8 | 6.81   | 1.91   | 1.91   | 150 | 152 | 4479.23 |
| CFDC      | Nov-8-2011                 | CAICE | NA | NA | NA | NA | Wave | 7.5   | -32.9 | 4.62   | 1.57   | 1.57   | 150 | 152 | 3039.69 |
| CFDC      | Nov-8-2011                 | CAICE | NA | NA | NA | NA | Wave | 7.5   | -32.9 | 4.33   | 1.52   | 1.52   | 150 | 152 | 2848.05 |
| CFDC      | Nov-8-2011                 | CAICE | NA | NA | NA | NA | Wave | 7.5   | -32.6 | 4.30   | 1.51   | 1.51   | 150 | 152 | 2829.16 |
| MOUDI-DFT | Nov-10-2011 to Nov-11-2011 | CAICE | NA | NA | NA | NA | Wave | 27168 | -18.0 | 0.04   | 0.03   | 0.03   | 175 | 275 | 12.87   |
| MOUDI-DFT | Nov-10-2011 to Nov-11-2011 | CAICE | NA | NA | NA | NA | Wave | 27168 | -20.0 | 0.07   | 0.05   | 0.05   | 175 | 275 | 26.94   |
| MOUDI-DFT | Nov-10-2011 to Nov-11-2011 | CAICE | NA | NA | NA | NA | Wave | 27168 | -25.0 | 0.19   | 0.10   | 0.10   | 175 | 275 | 70.22   |
| MOUDI-DFT | Nov-10-2011 to Nov-11-2011 | CAICE | NA | NA | NA | NA | Wave | 27168 | -28.0 | 0.31   | 0.15   | 0.15   | 175 | 275 | 111.55  |
| MOUDI-DFT | Nov-10-2011 to Nov-11-2011 | CAICE | NA | NA | NA | NA | Wave | 27168 | -30.0 | 1.59   | 0.55   | 0.55   | 175 | 275 | 578.62  |
| MOUDI-DFT | Nov-10-2011 to Nov-11-2011 | CAICE | NA | NA | NA | NA | Wave | 27168 | -33.0 | 4.30   | 1.33   | 1.33   | 175 | 275 | 1565.10 |
| IS-filter | Nov-10-2011 to Nov-11-2011 | CAICE | NA | NA | NA | NA | Wave | 7360  | -14.0 | 0.0009 | 0.0006 | 0.0014 | 175 | 152 | 0.62    |
| IS-filter | Nov-10-2011 to Nov-11-2011 | CAICE | NA | NA | NA | NA | Wave | 7360  | -16.0 | 0.0017 | 0.0009 | 0.0017 | 175 | 152 | 1.13    |
| IS-filter | Nov-10-2011 to Nov-11-2011 | CAICE | NA | NA | NA | NA | Wave | 7360  | -18.0 | 0.0090 | 0.0030 | 0.0039 | 175 | 152 | 5.91    |
| IS-filter | Nov-10-2011 to Nov-11-2011 | CAICE | NA | NA | NA | NA | Wave | 7360  | -20.0 | 0.0270 | 0.0093 | 0.0100 | 175 | 152 | 17.77   |

|           |                            |       |    |    |    |    |      |      |       |        |        |        |      |     |           |
|-----------|----------------------------|-------|----|----|----|----|------|------|-------|--------|--------|--------|------|-----|-----------|
| IS-filter | Nov-10-2011 to Nov-11-2011 | CAICE | NA | NA | NA | NA | Wave | 7360 | -21.0 | 0.0301 | 0.0108 | 0.0119 | 175  | 152 | 19.83     |
| CFDC      | Nov-11-2011                | CAICE | NA | NA | NA | NA | Wave | 7.5  | -30.5 | 0.91   | 0.70   | 0.70   | 150  | 152 | 597.74    |
| CFDC      | Nov-11-2011                | CAICE | NA | NA | NA | NA | Wave | 7.5  | -29.9 | 0.83   | 0.66   | 0.66   | 150  | 152 | 544.61    |
| CFDC      | Nov-11-2011                | CAICE | NA | NA | NA | NA | Wave | 7.5  | -29.9 | 0.53   | 0.53   | 0.53   | 150  | 152 | 350.49    |
| CFDC      | Nov-11-2011                | CAICE | NA | NA | NA | NA | Wave | 7.5  | -33.0 | 1.39   | 0.86   | 0.86   | 150  | 152 | 912.23    |
| CFDC      | Nov-11-2011                | CAICE | NA | NA | NA | NA | Wave | 7.5  | -32.8 | 2.34   | 1.12   | 1.12   | 150  | 152 | 1542.07   |
| CFDC      | Nov-11-2011                | CAICE | NA | NA | NA | NA | Wave | 7.5  | -33.0 | 2.97   | 1.26   | 1.26   | 150  | 152 | 1954.51   |
| CFDC      | Nov-11-2011                | CAICE | NA | NA | NA | NA | Wave | 7.5  | -33.0 | 2.05   | 1.05   | 1.05   | 150  | 152 | 1348.99   |
| CFDC      | Nov-11-2011                | CAICE | NA | NA | NA | NA | Wave | 7.5  | -33.0 | 1.21   | 0.80   | 0.80   | 150  | 152 | 798.93    |
| CFDC      | Nov-11-2011                | CAICE | NA | NA | NA | NA | Wave | 7.5  | -33.2 | 2.48   | 1.15   | 1.15   | 150  | 152 | 1633.23   |
| CFDC      | Nov-11-2011                | CAICE | NA | NA | NA | NA | Wave | 7.5  | -32.7 | 2.50   | 1.15   | 1.15   | 150  | 152 | 1645.33   |
| CFDC      | Nov-11-2011                | CAICE | NA | NA | NA | NA | Wave | 7.5  | -30.1 | 1.49   | 0.89   | 0.89   | 150  | 152 | 978.64    |
| CFDC      | Jan-27-2013                | CAICE | NA | NA | NA | NA | MART | 10   | -26.0 | 170    | 82.46  | 82.46  | 550  | 500 | 34000.00  |
| CFDC      | Jan-27-2013                | CAICE | NA | NA | NA | NA | MART | 10   | -28.0 | 480    | 138.56 | 138.56 | 550  | 500 | 96000.00  |
| CFDC      | Jan-27-2013                | CAICE | NA | NA | NA | NA | MART | 10   | -28.0 | 900    | 189.74 | 189.74 | 550  | 500 | 180000.00 |
| CFDC      | Jan-27-2013                | CAICE | NA | NA | NA | NA | MART | 10   | -30.0 | 1200   | 219.09 | 219.09 | 550  | 500 | 240000.00 |
| CFDC      | Jan-27-2013                | CAICE | NA | NA | NA | NA | MART | 10   | -30.0 | 1500   | 244.95 | 244.95 | 550  | 500 | 300000.00 |
| IS-filter | Jan-27-2013                | CAICE | NA | NA | NA | NA | MART | 565  | -7.0  | 0.0049 | 0.0039 | 0.0214 | 550  | 500 | 0.98      |
| IS-filter | Jan-27-2013                | CAICE | NA | NA | NA | NA | MART | 565  | -9.0  | 0.0049 | 0.0039 | 0.0214 | 550  | 500 | 0.98      |
| IS-filter | Jan-27-2013                | CAICE | NA | NA | NA | NA | MART | 565  | -11.0 | 0.0207 | 0.0127 | 0.0305 | 550  | 500 | 4.14      |
| IS-filter | Jan-27-2013                | CAICE | NA | NA | NA | NA | MART | 565  | -13.0 | 0.0207 | 0.0127 | 0.0305 | 550  | 500 | 4.14      |
| IS-filter | Jan-27-2013                | CAICE | NA | NA | NA | NA | MART | 565  | -15.0 | 0.0207 | 0.0127 | 0.0305 | 550  | 500 | 4.14      |
| IS-filter | Jan-27-2013                | CAICE | NA | NA | NA | NA | MART | 565  | -17.0 | 0.0382 | 0.0203 | 0.0377 | 550  | 500 | 7.65      |
| IS-filter | Jan-27-2013                | CAICE | NA | NA | NA | NA | MART | 565  | -19.0 | 0.0652 | 0.0301 | 0.0470 | 550  | 500 | 13.05     |
| IS-filter | Jan-27-2013                | CAICE | NA | NA | NA | NA | MART | 565  | -21.0 | 0.2829 | 0.1073 | 0.1248 | 550  | 500 | 56.58     |
| IS-filter | Jan-27-2013                | CAICE | NA | NA | NA | NA | MART | 565  | -23.0 | 2.4448 | 0.9259 | 1.0735 | 550  | 500 | 488.97    |
| CFDC      | Jan-15-2014                | CAICE | NA | NA | NA | NA | MART | 15   | -26.4 | 9.01   | 1.55   | 0.64   | 1000 | 930 | 969.33    |
| CFDC      | Jan-15-2014                | CAICE | NA | NA | NA | NA | MART | 15   | -30.1 | 113.72 | 5.51   | 1.21   | 1000 | 930 | 12227.53  |

|           |                             |            |       |        |    |     |         |       |          |        |        |        |      |     |         |
|-----------|-----------------------------|------------|-------|--------|----|-----|---------|-------|----------|--------|--------|--------|------|-----|---------|
| CFDC      | Jan-15-2014                 | CAICE      | NA    | NA     | NA | NA  | MART    | 15    | -22.3    | 0.09   | 0.09   | 0.16   | 1000 | 930 | 10.11   |
| CFDC      | Jan-15-2014                 | CAICE      | NA    | NA     | NA | NA  | MART    | 15    | -23.4    | 1.22   | 0.57   | 0.39   | 1000 | 930 | 131.09  |
| CFDC      | Jan-15-2014                 | CAICE      | NA    | NA     | NA | NA  | MART    | 15    | -26.6    | 11.11  | 1.72   | 0.68   | 1000 | 930 | 1194.21 |
| CFDC      | Jan-15-2014                 | CAICE      | NA    | NA     | NA | NA  | MART    | 15    | -29.0    | 45.24  | 3.47   | 0.96   | 1000 | 930 | 4864.03 |
| IS-filter | Jan-15-2014                 | CAICE      | NA    | NA     | NA | NA  | MART    | 415   | -15.5    | 0.0064 | 0.0051 | 0.0280 | 1000 | 930 | 0.69    |
| IS-filter | Jan-15-2014                 | CAICE      | NA    | NA     | NA | NA  | MART    | 415   | -16.1    | 0.0064 | 0.0051 | 0.0280 | 1000 | 930 | 0.69    |
| IS-filter | Jan-15-2014                 | CAICE      | NA    | NA     | NA | NA  | MART    | 415   | -17.0    | 0.0064 | 0.0051 | 0.0280 | 1000 | 930 | 0.69    |
| IS-filter | Jan-15-2014                 | CAICE      | NA    | NA     | NA | NA  | MART    | 415   | -18.0    | 0.0131 | 0.0093 | 0.0319 | 1000 | 930 | 1.41    |
| IS-filter | Jan-15-2014                 | CAICE      | NA    | NA     | NA | NA  | MART    | 415   | -19.0    | 0.0201 | 0.0137 | 0.0354 | 1000 | 930 | 2.16    |
| IS-filter | Jan-15-2014                 | CAICE      | NA    | NA     | NA | NA  | MART    | 415   | -20.0    | 0.0611 | 0.0313 | 0.0537 | 1000 | 930 | 6.57    |
| IS-filter | Jan-15-2014                 | CAICE      | NA    | NA     | NA | NA  | MART    | 415   | -20.6    | 0.0923 | 0.0430 | 0.0658 | 1000 | 930 | 9.93    |
| IS-filter | Jan-15-2014                 | CAICE      | NA    | NA     | NA | NA  | MART    | 415   | -21.0    | 0.1044 | 0.0480 | 0.0708 | 1000 | 930 | 11.22   |
| IS-filter | Jan-15-2014                 | CAICE      | NA    | NA     | NA | NA  | MART    | 415   | -21.6    | 0.1044 | 0.0480 | 0.0708 | 1000 | 930 | 11.22   |
| IS-filter | Jan-15-2014                 | CAICE      | NA    | NA     | NA | NA  | MART    | 415   | -22.0    | 0.1655 | 0.0708 | 0.0935 | 1000 | 930 | 17.79   |
| IS-filter | Jan-15-2014                 | CAICE      | NA    | NA     | NA | NA  | MART    | 415   | -22.5    | 0.2988 | 0.1295 | 0.1523 | 1000 | 930 | 32.13   |
| IS-filter | Jan-15-2014                 | CAICE      | NA    | NA     | NA | NA  | MART    | 415   | -23.5    | 1.2998 | 0.7179 | 1.4013 | 1000 | 930 | 139.76  |
| DFT       | Jul-15-2014                 | Arctic     | 69.36 | -64.85 | 20 | 2.9 | NETCARE | 200   | Averages | below  | -      | -      | -    | -   | -       |
| DFT       | Jul-16-2014                 | Arctic     | 71.7  | -71.12 | 20 | 4.2 | NETCARE | 200   | -22.5    | 0.0562 | 0.0460 | 0.1347 | 1800 | 14  | 401.34  |
| DFT       | Jul-26-2014                 | Arctic     | 73.93 | -75.27 | 20 | 4.6 | NETCARE | 200   | -25.0    | 0.0805 | 0.0700 | 0.1930 | 1800 | 14  | 575.31  |
| DFT       | Jul-28-2014                 | Arctic     | 73.26 | -57.88 | 20 | 1.5 | NETCARE | 200   | -27.5    | 0.4629 | 0.3529 | 0.8535 | 1800 | 14  | 3306.21 |
| DFT       | Jul-31-2014                 | Arctic     | 76.32 | -73.27 | 20 | 3.5 | NETCARE | 200   | Averages | above  | -      | -      | -    | -   | -       |
| IS-filter | Jul-27-2012 to July 28-2012 | Bering Sea | 62.57 | 173.7  | 20 | 6.1 | SHIPPO  | 13556 | -12.0    | 0.0002 | 0.0002 | 0.0011 | 500  | 16  | 1.55    |
| IS-filter | Jul-27-2012 to July 28-2012 | Bering Sea | 62.57 | 173.7  | 20 | 6.1 | SHIPPO  | 13556 | -14.0    | 0.0031 | 0.0014 | 0.0023 | 500  | 16  | 19.20   |
| IS-filter | Jul-27-2012 to July 28-2012 | Bering Sea | 62.57 | 173.7  | 20 | 6.1 | SHIPPO  | 13556 | -16.0    | 0.0041 | 0.0017 | 0.0026 | 500  | 16  | 25.44   |
| IS-filter | Jul-27-2012 to July 28-2012 | Bering Sea | 62.57 | 173.7  | 20 | 6.1 | SHIPPO  | 13556 | -18.0    | 0.0130 | 0.0042 | 0.0051 | 500  | 16  | 81.04   |

|           |                                |               |       |       |    |     |        |       |       |        |        |        |     |    |        |
|-----------|--------------------------------|---------------|-------|-------|----|-----|--------|-------|-------|--------|--------|--------|-----|----|--------|
| IS-filter | Jul-27-2012 to<br>July 28-2012 | Bering<br>Sea | 62.57 | 173.7 | 20 | 6.1 | SHIPPO | 13556 | -20.0 | 0.0227 | 0.0073 | 0.0082 | 500 | 16 | 142.02 |
|-----------|--------------------------------|---------------|-------|-------|----|-----|--------|-------|-------|--------|--------|--------|-----|----|--------|
